# Supplementary material
Source: Springer Nature journal article supplement (https://www.springermedizin.de/resource/supplementary/12879_2005_260_MOESM5_ESM.pdf/9448300)
Supplement: MOESM5 [file 9448300]

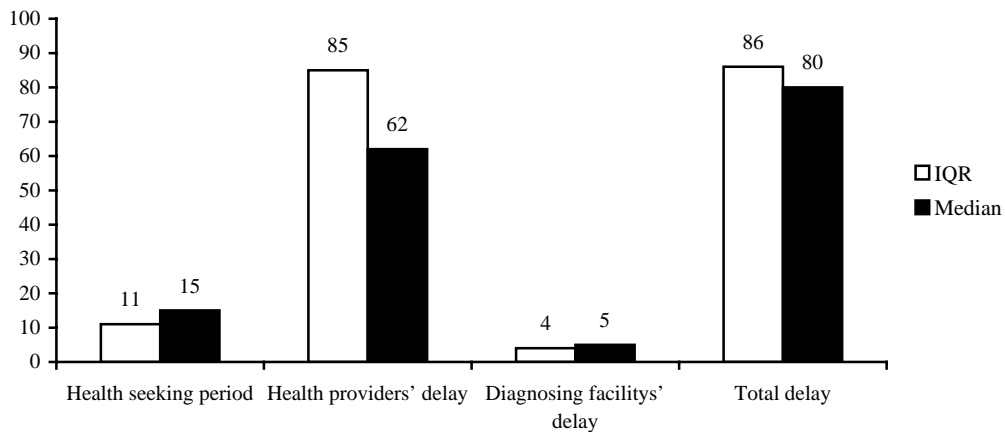

i

i

| Quartile | Health seeking period | Health providers' delay | Diagnosing facilities' delay | Total delay |
|----------|-----------------------|-------------------------|------------------------------|-------------|
| Q1       | 10                    | 31                      | 4                            | 44          |
| Q3       | 21                    | 116                     | 8                            | 130         |
